# Supplementary material for: Regulation of gingival keratinocyte monocyte chemoattractant protein‐1‐induced protein (MCPIP)‐1 and mucosa‐associated lymphoid tissue lymphoma translocation protein (MALT)‐1 expressions by periodontal bacteria, lipopolysaccharide, and interleukin‐1β
Source: PubMed Central journal article supplement — J Periodontol. 2022 Aug 4;94(1):130–40. doi: 10.1002/JPER.22-0093 (PMC10087685; doi:10.1002/jper.22-0093), 2022-08-04
Supplement: JPER-94-130-s002.pdf [file JPER-94-130-s002.pdf]

2 hour Incubation

Actin

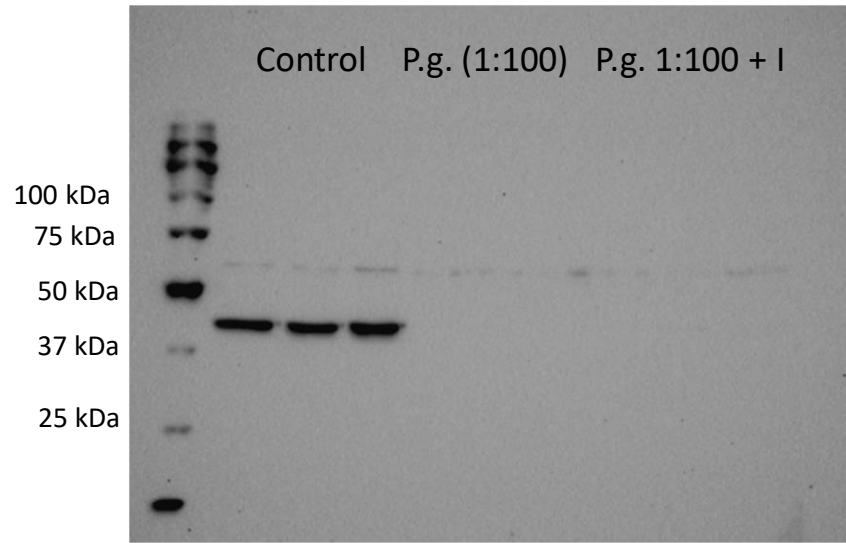

MCPIP-1

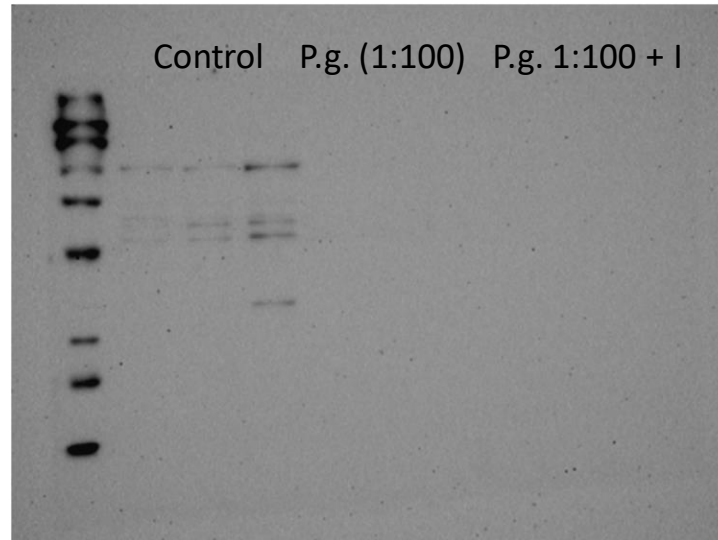

MALT 1

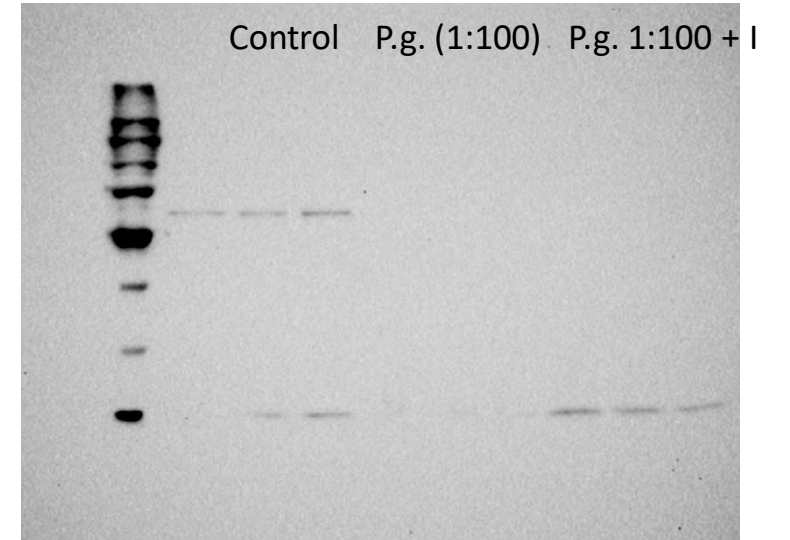

P.g. (1:100) HK P.g. 1:100 HK + I

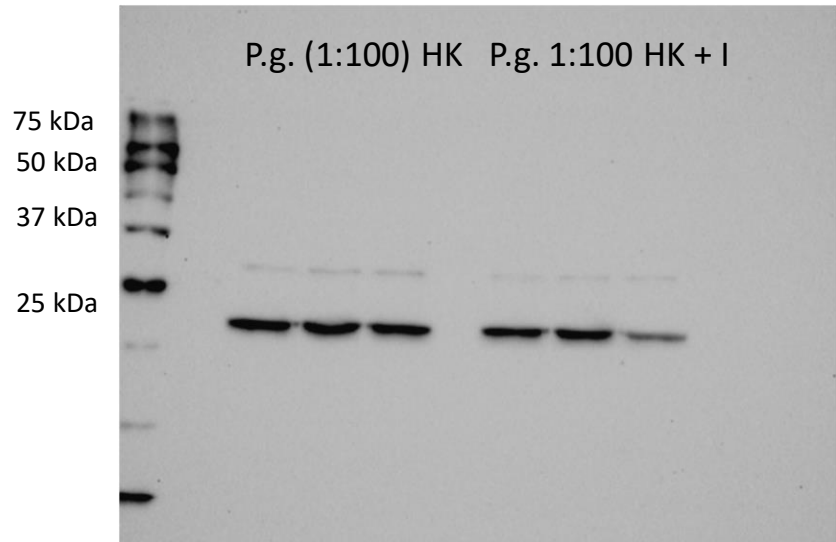

P.g. (1:100) HK P.g. 1:100 HK + I

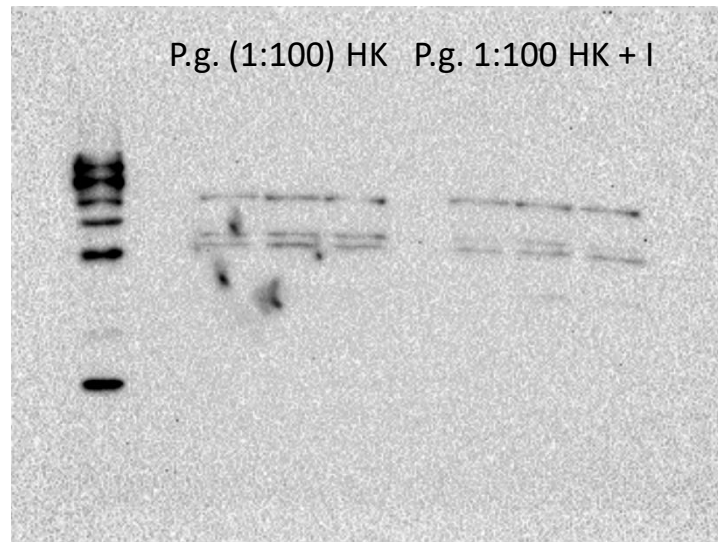

P.g. (1:100) HK P.g. 1:100 HK + I

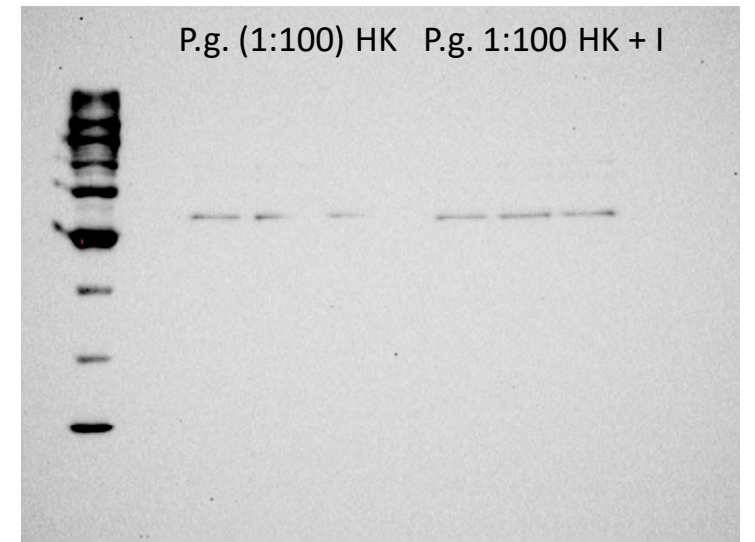

6 hour Incubation

Actin

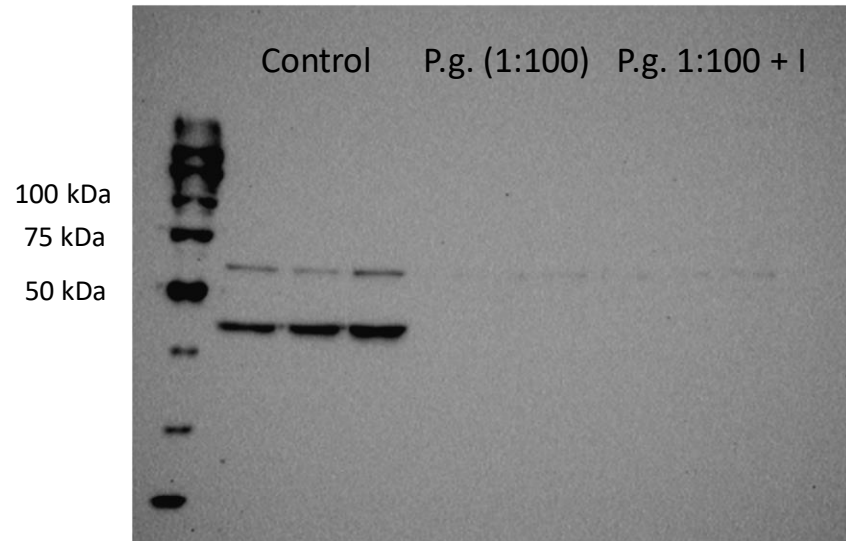

MCPIP-1

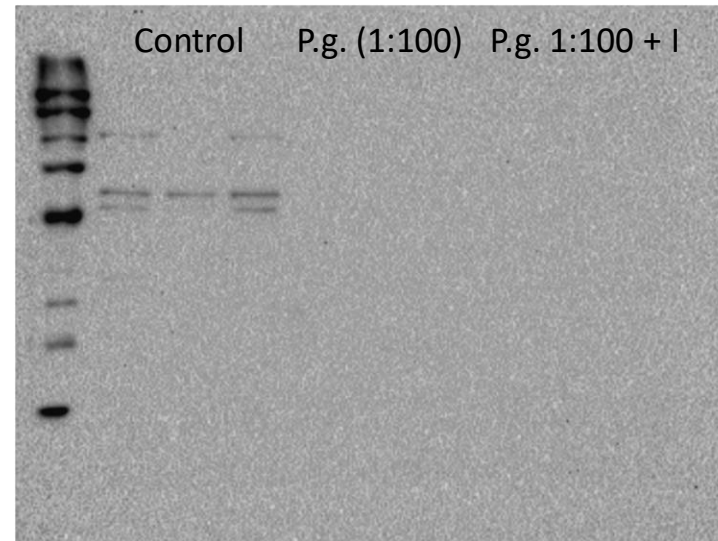

MALT 1

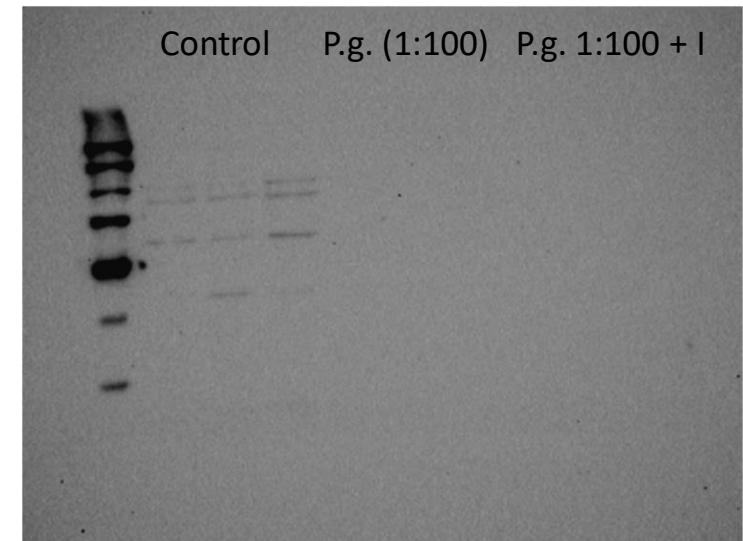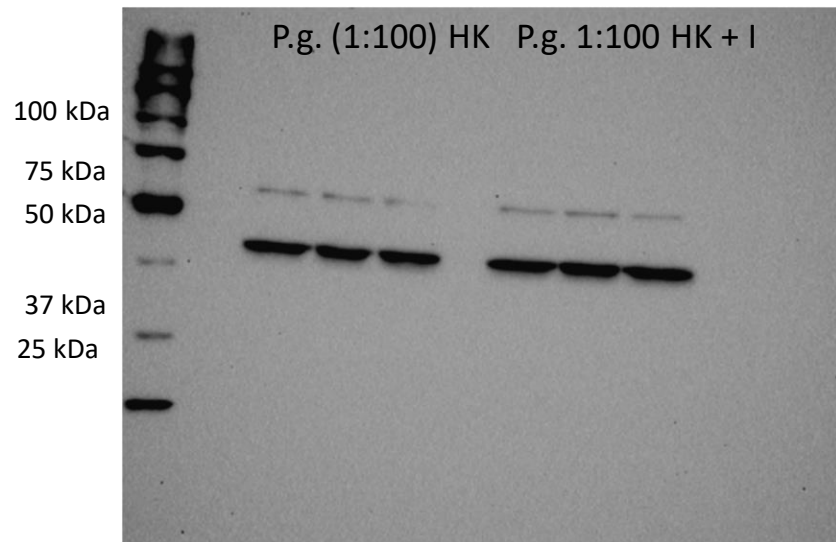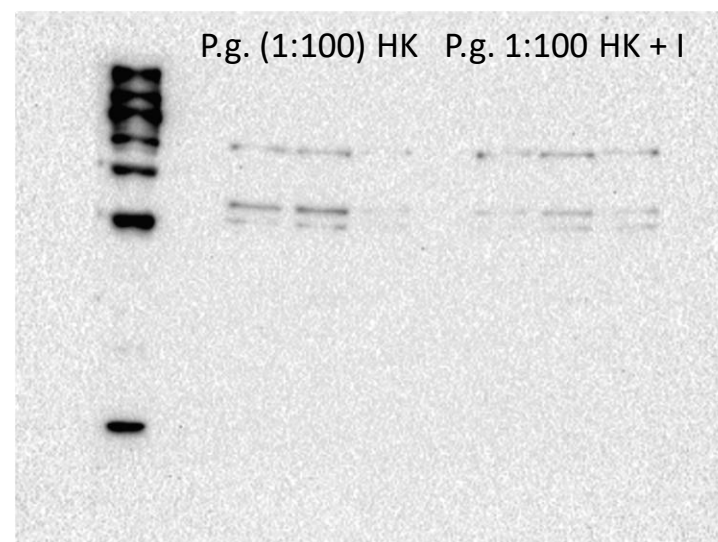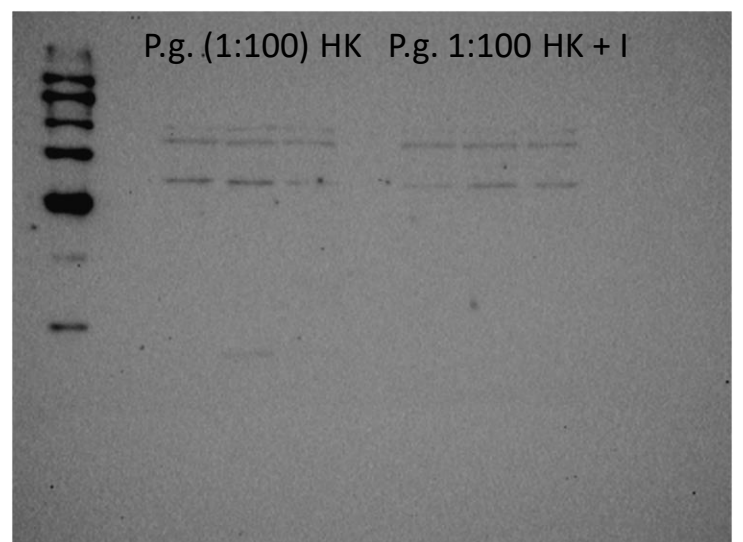

24 hour Incubation

Actin

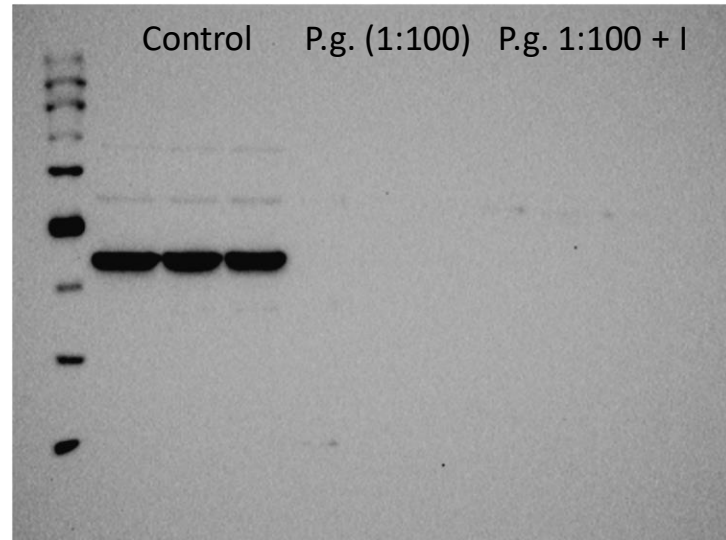

MCPIP-1

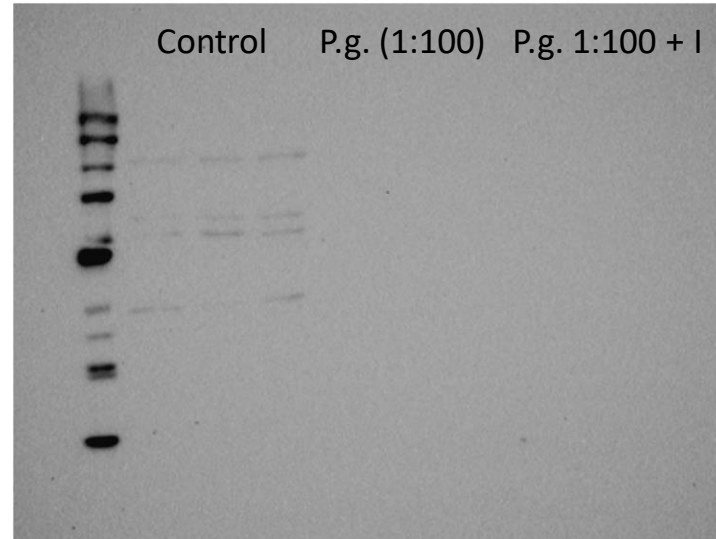

MALT 1

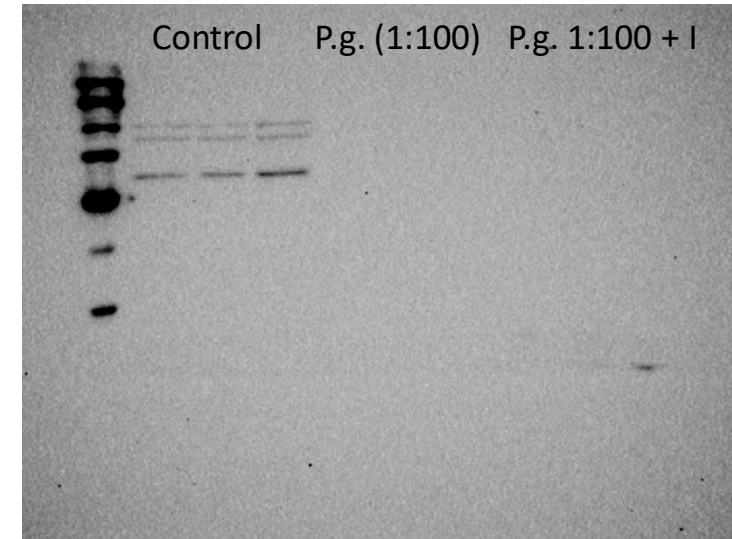

P.g. (1:100) HK P.g. 1:100 HK + I

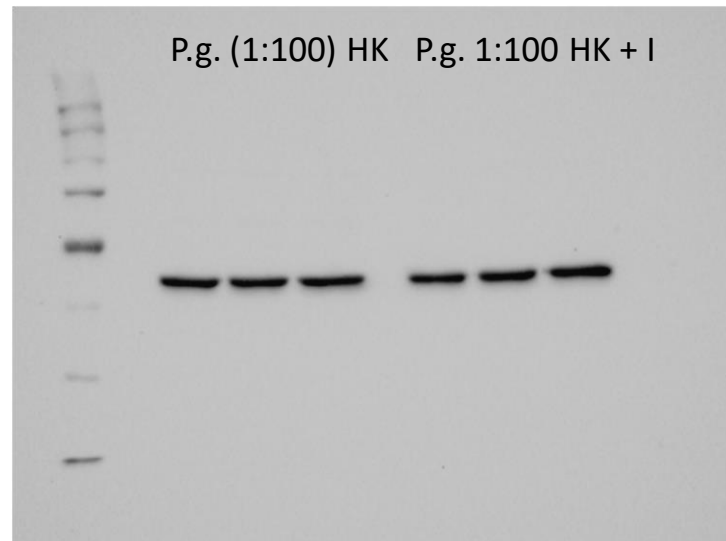

P.g. (1:100) HK P.g. 1:100 HK + I

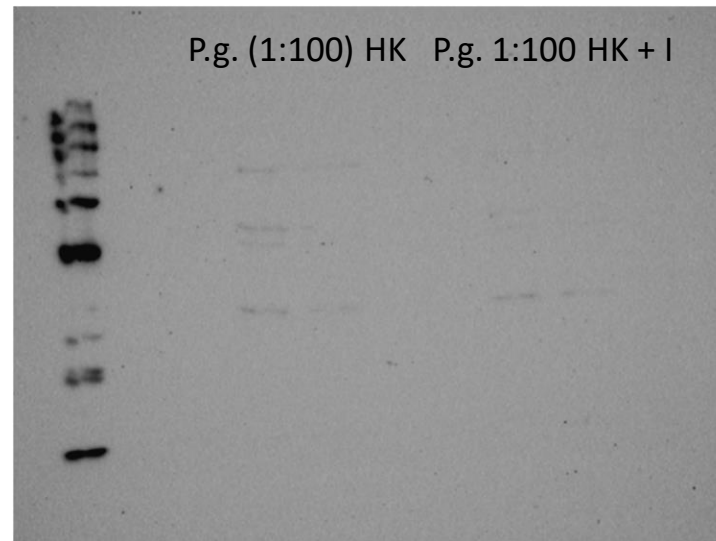

P.g. (1:100) HK P.g. 1:100 HK + I

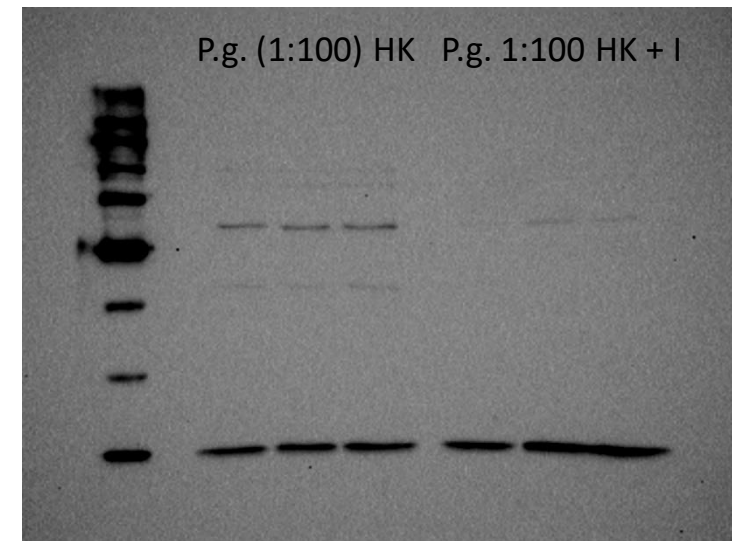

75 kDa  
50 kDa  
37 kDa
