# Supplementary figures and images for: Regulation of gingival keratinocyte monocyte chemoattractant protein‐1‐induced protein (MCPIP)‐1 and mucosa‐associated lymphoid tissue lymphoma translocation protein (MALT)‐1 expressions by periodontal bacteria, lipopolysaccharide, and interleukin‐1β
Source: PubMed Central journal article supplement — J Periodontol. 2022 Aug 4;94(1):130–40. doi: 10.1002/JPER.22-0093 (PMC10087685; doi:10.1002/jper.22-0093), 2022-08-04

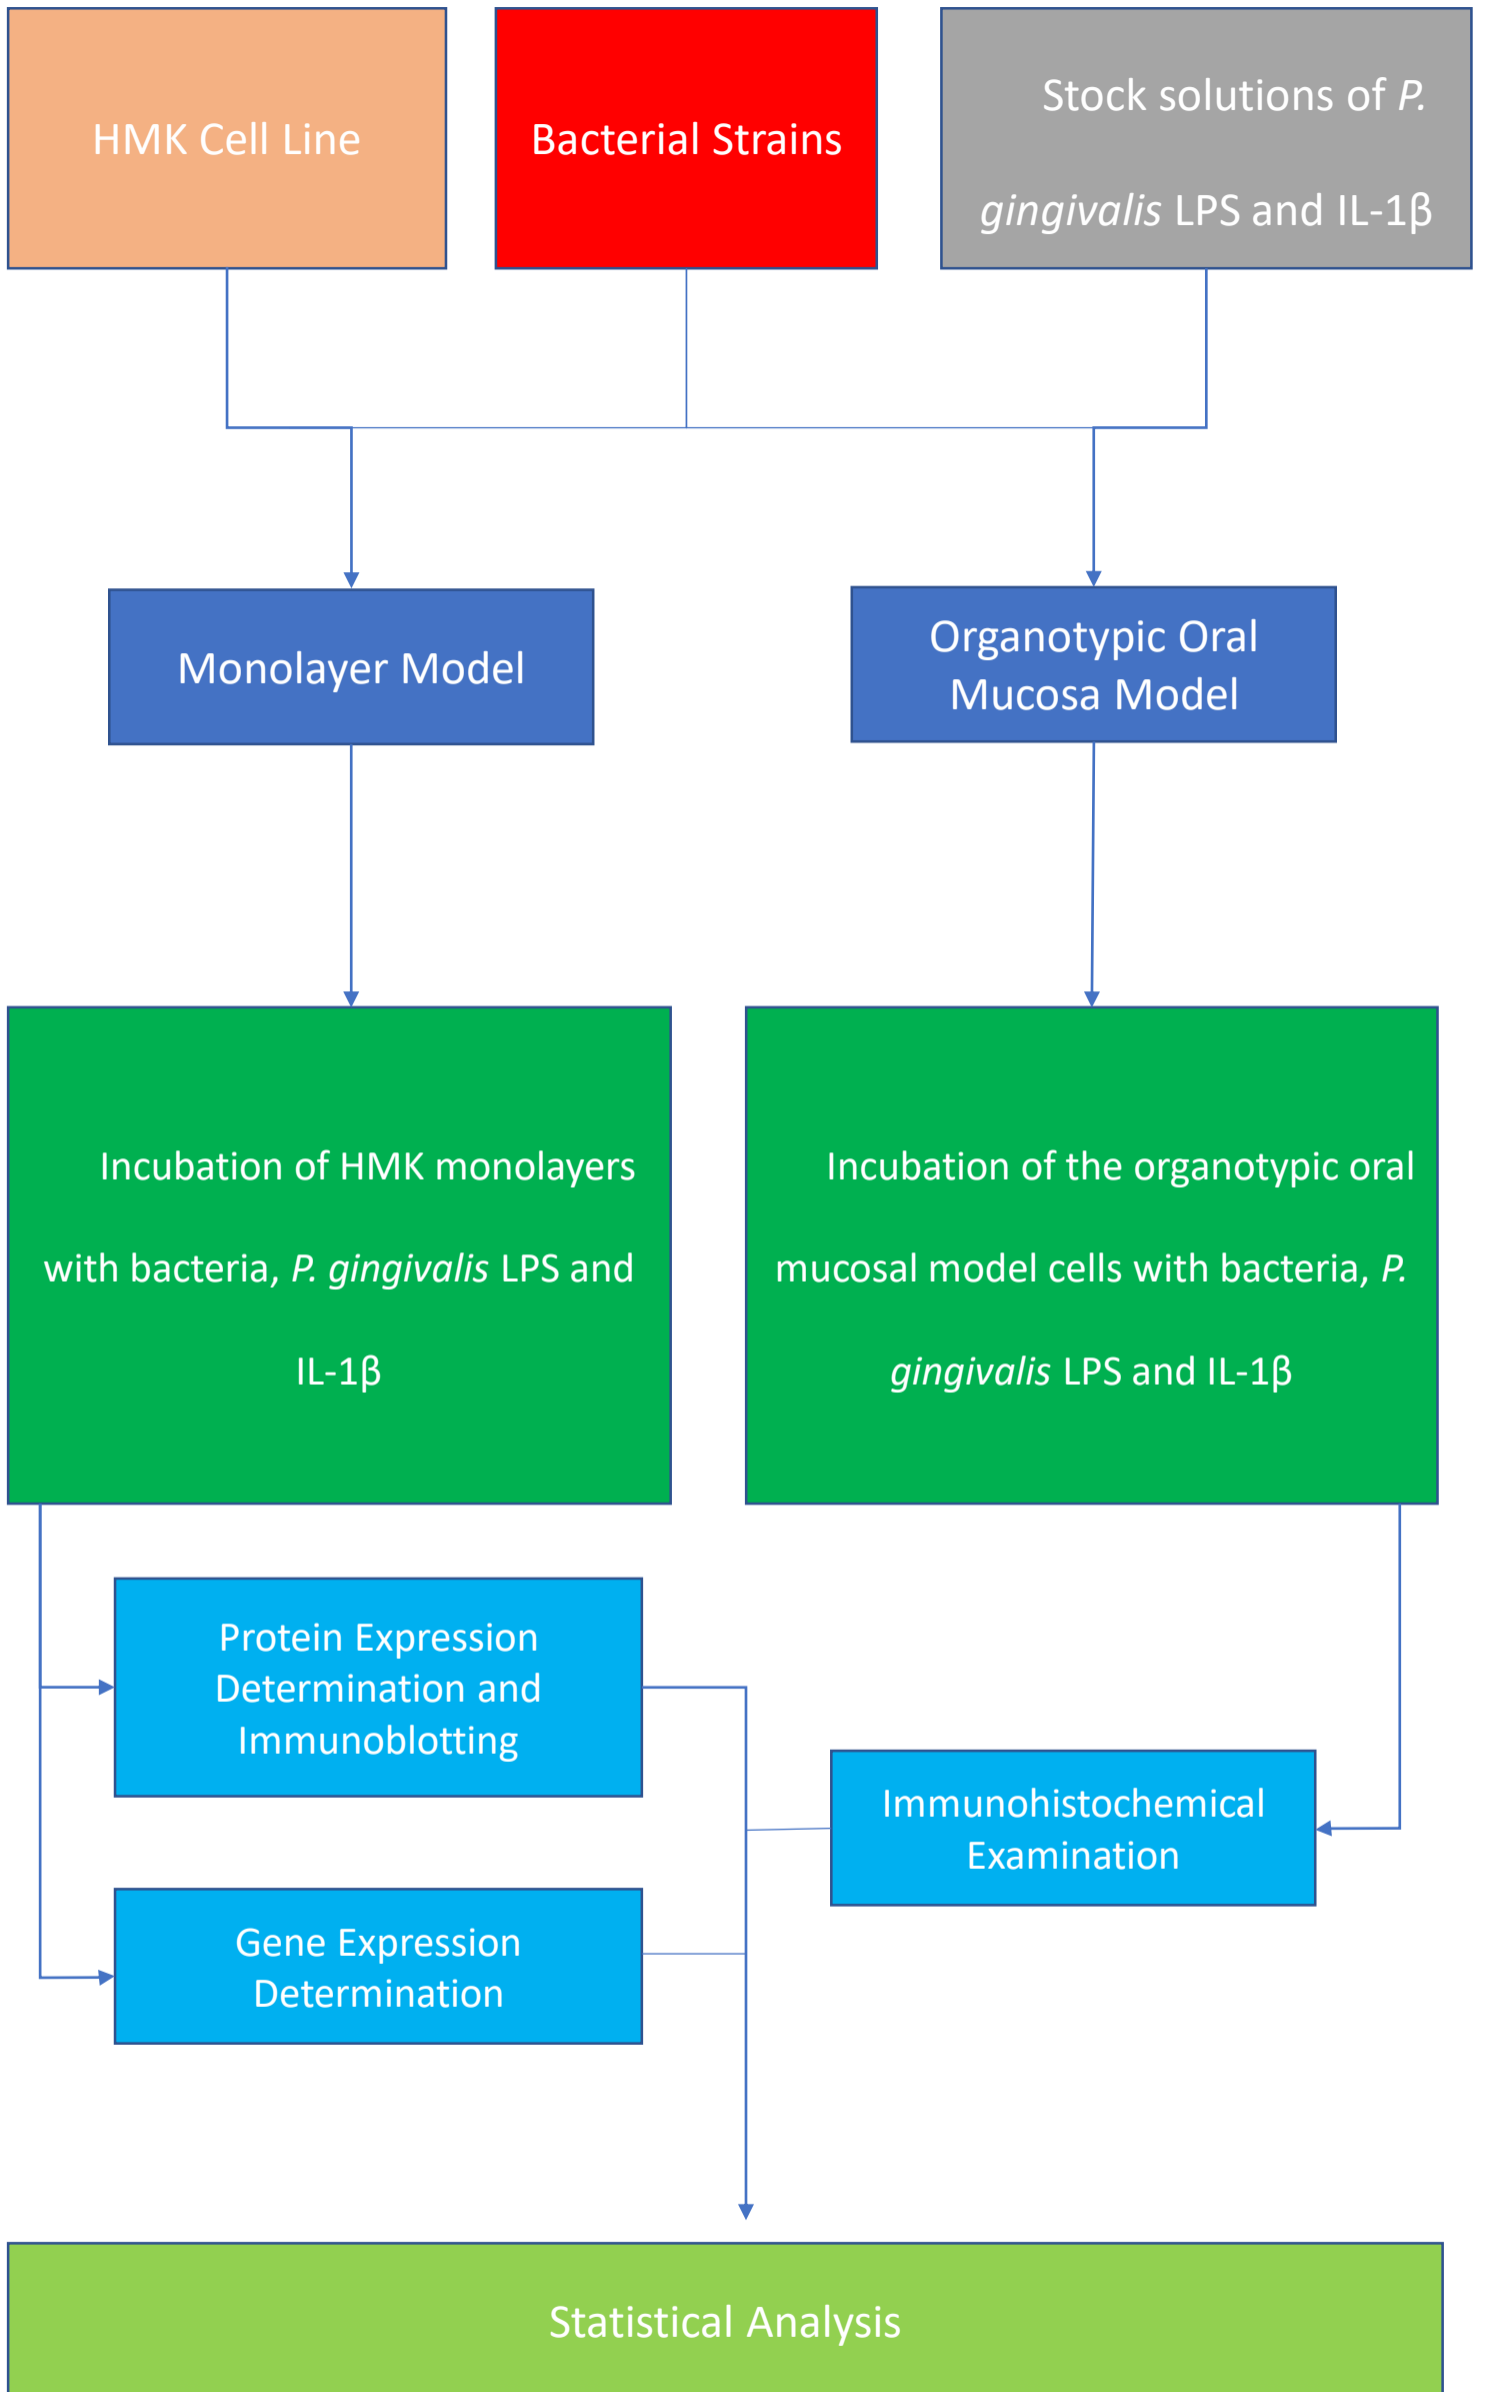

Supplement: JPER-94-130-s001.pdf [file JPER-94-130-s001.pdf]
